# Supplementary material for: Construction of the NaTi2(PO4)3/C electrode with a one-dimensional porous hybrid structure as an advanced anode for sodium-ion batteries
Source: Royal Society of Chemistry journal article supplement (doi:10.1039/d0dt00548g), 2020-01-01
Supplement: d0dt00548g1.pdf [file d0dt00548g1.pdf]

# Electronic Supplementary Information

## **Construction of the $\text{NaTi}_2(\text{PO}_4)_3/\text{C}$ electrode with one dimensional porous hybrid structure as an advanced anode for sodium ion batteries**

Yakun Tang, Lang Liu,\* Yue Zhang, Jing Xie, Yang Gao, Xingyan Zeng, and Yang  
Zhang

*Key Laboratory of Energy Materials Chemistry, Ministry of Education; Institute of Applied Chemistry, Xinjiang University, Urumqi 830046, Xinjiang, China.*

*E-mail: liulang@xju.edu.cn; llyhs1973@sina.com*

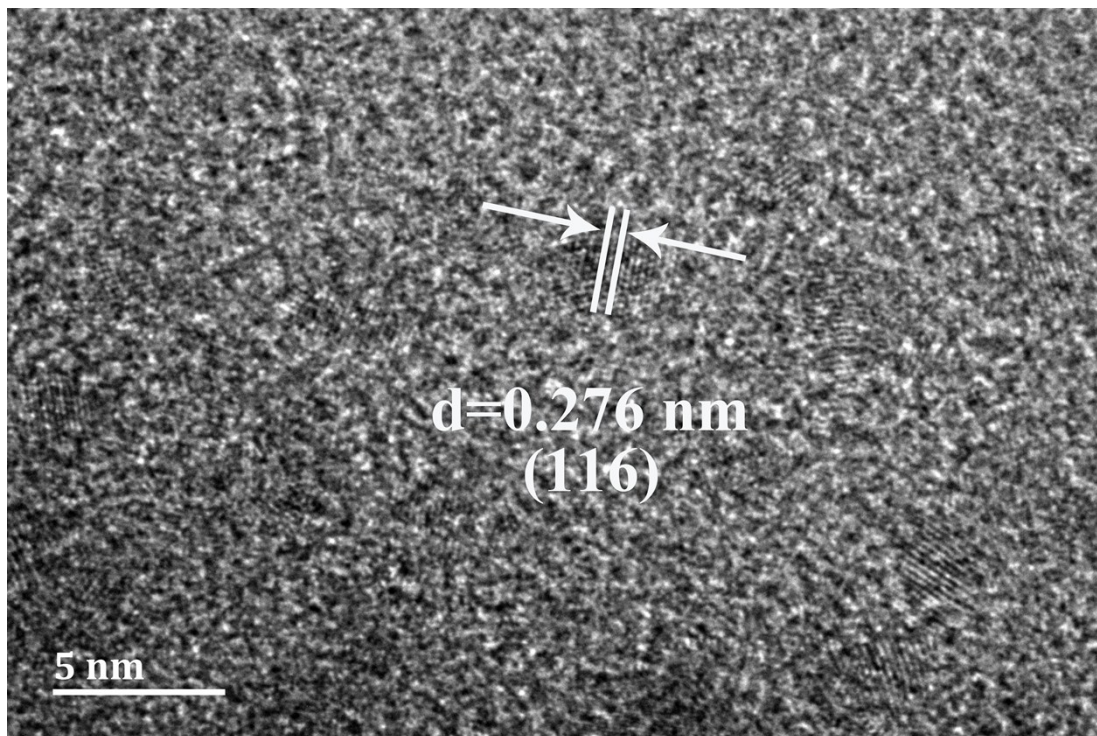

**Fig. S1** The HRTEM image of NTP.

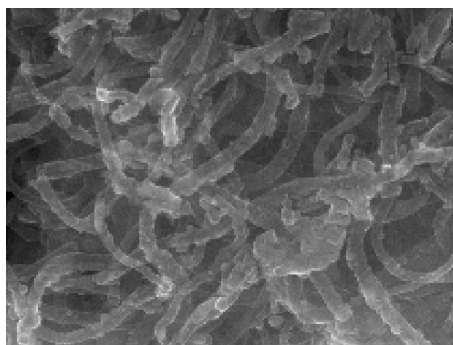

**Fig. S2** The SEM image of EDS mappings.

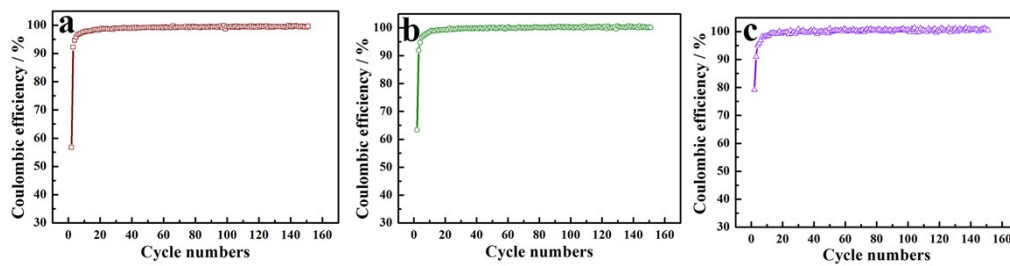

**Fig. S3** The coulombic efficiency of the cycled cells at 0.2 A g<sup>-1</sup> (a), 2 A g<sup>-1</sup> (b), 5 A g<sup>-1</sup> (c).
